# Supplementary material for: Future hydro-climatic changes associated with global warming and stratospheric aerosol intervention scenarios across Central-South Asia and the Tibetan Plateau
Source: Copernicus journal article supplement (doi:10.5194/egusphere-2025-3493), 2025-08-14
Supplement: Supplementary file 1 [file egusphere-2025-3493-supplement.pdf]

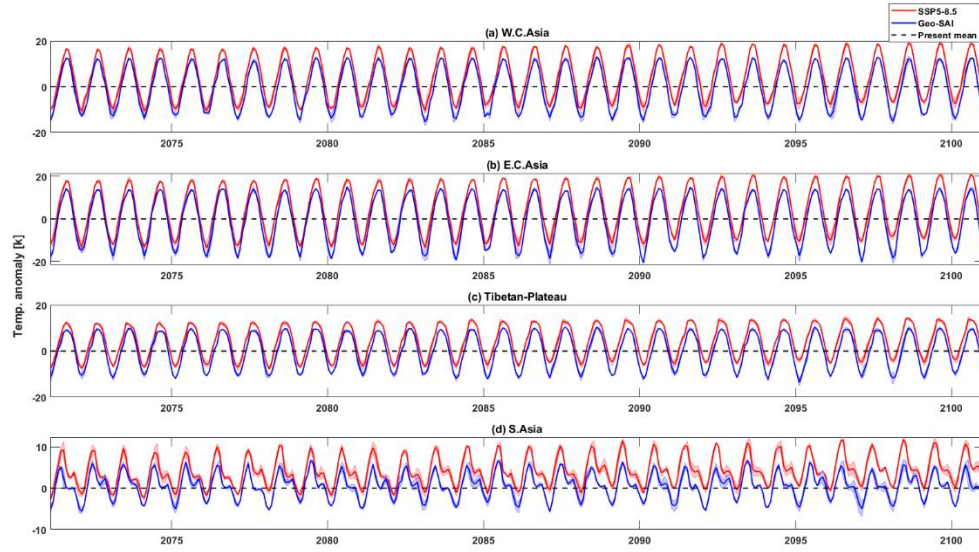

1  
2 **Figure S1.** The temperature anomaly relative to the temperature averaged over the present-  
3 day conditions (2015-2035) across CSATP under global warming (SSP5-8.5) and with  
4 Geo-SAI (SSP5-8.5-SAI). The sub-regions a-d are WCA, ECA, TP and SA, respectively.  
5 Shading in each curve shows the across-ensemble range. The dashed line crossing the y-  
6 axis at zero in each subplot is the ensemble mean of temperature over the historical period  
7 (1985–2014).

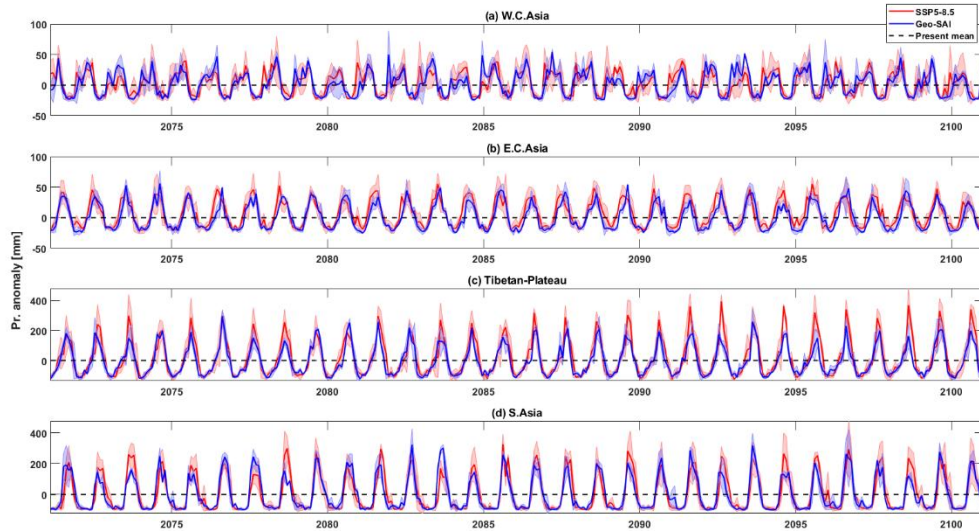

8  
9 **Figure S2.** Same as Figure S1, but for precipitation anomaly.

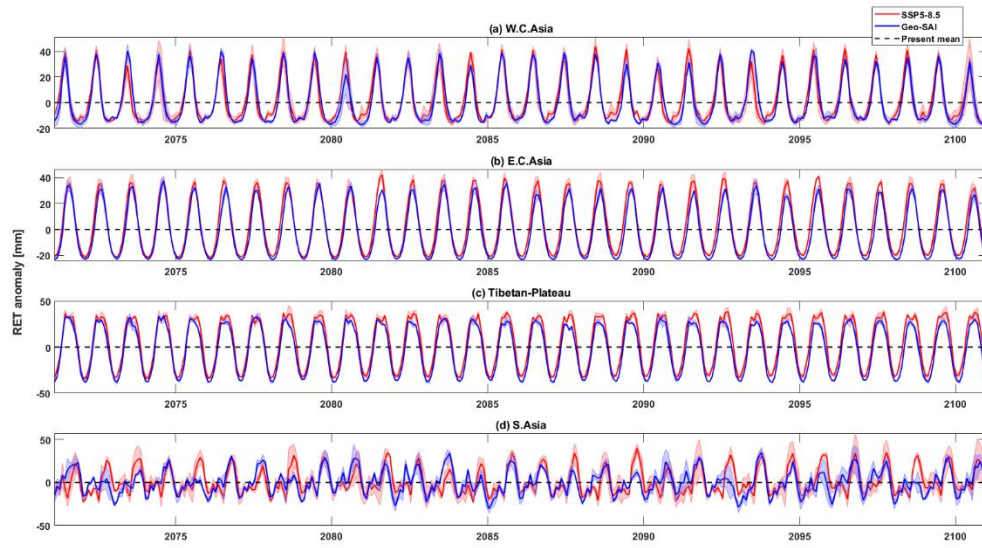

10

11 **Figure S3.** Same as Figure S1, but for Real ET anomaly

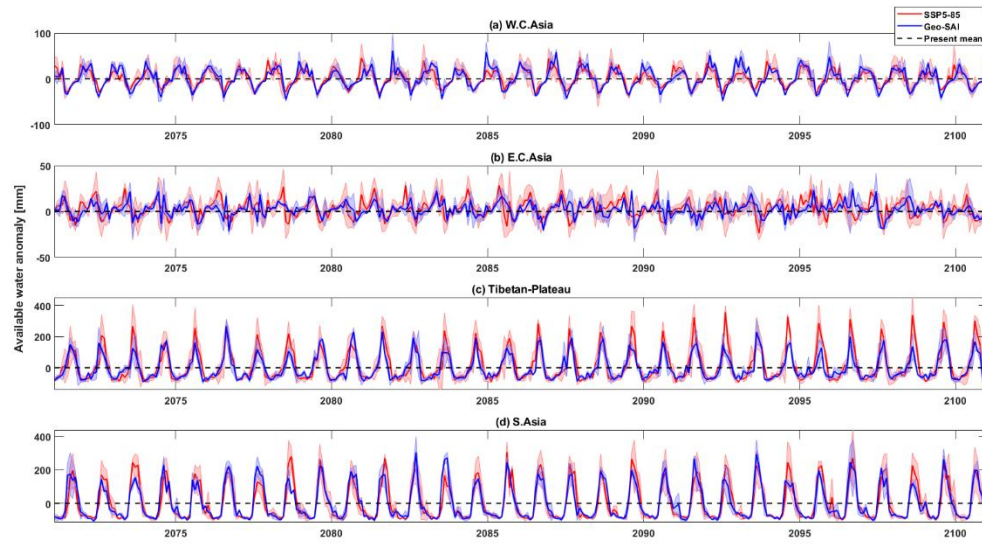

12

13 **Figure S4.** Same as Figure S1, but for available water anomaly.

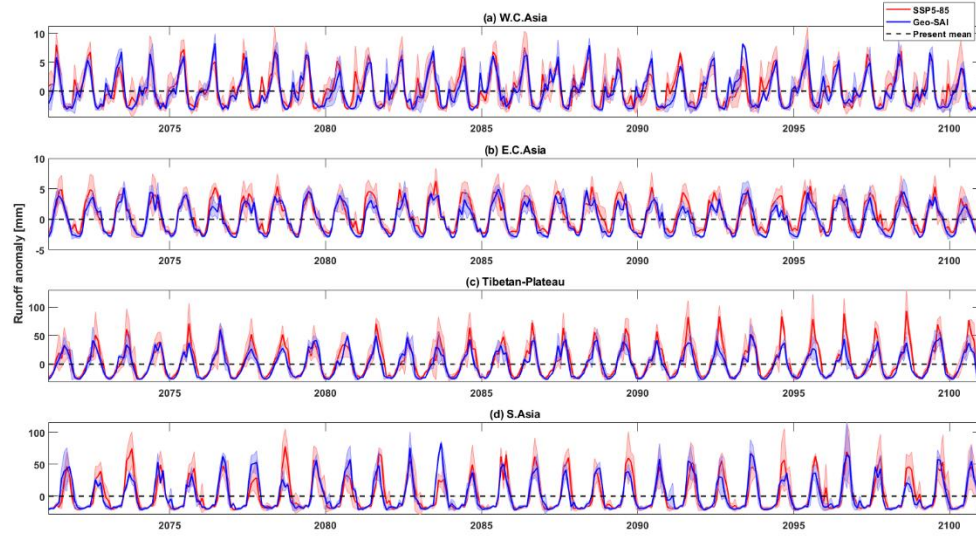

14

15 **Figure S5.** Same as Figure S1, but for runoff anomaly.

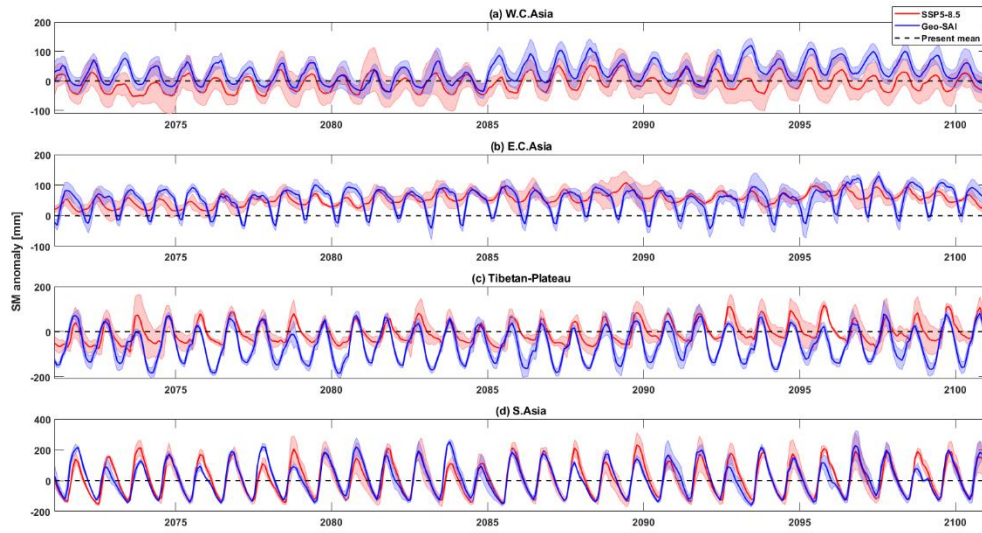

16

17 **Figure S6.** Same as Figure S1, but for soil moisture anomaly.



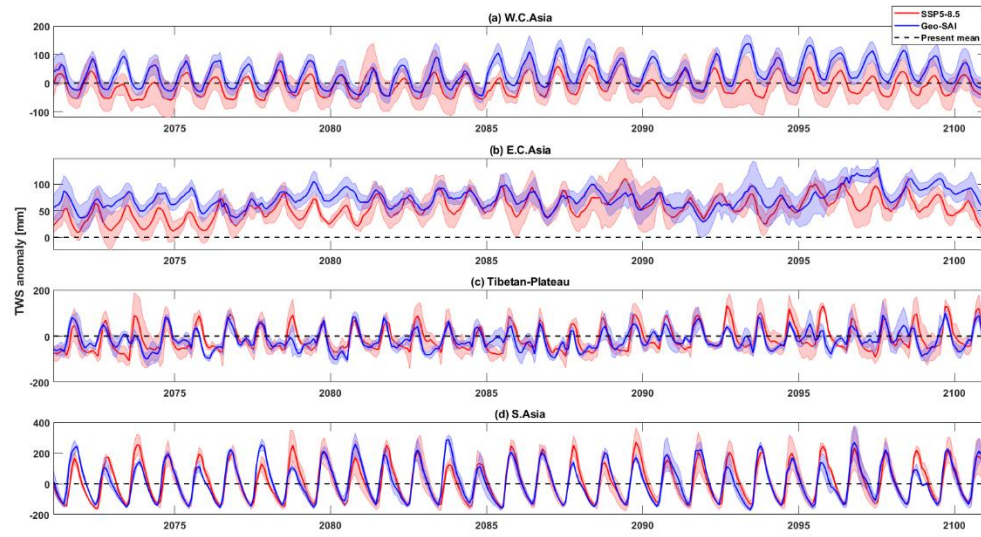

18  
19 **Figure S7.** Same as Figure S1, but for TWS anomaly

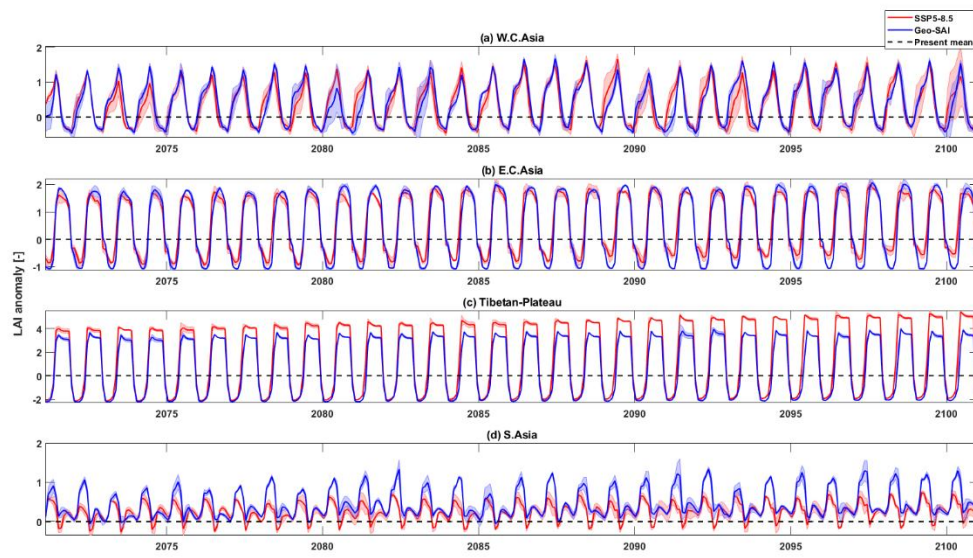

20  
21 **Figure S8.** Same as Figure S1, but for Leaf Area Index anomaly.

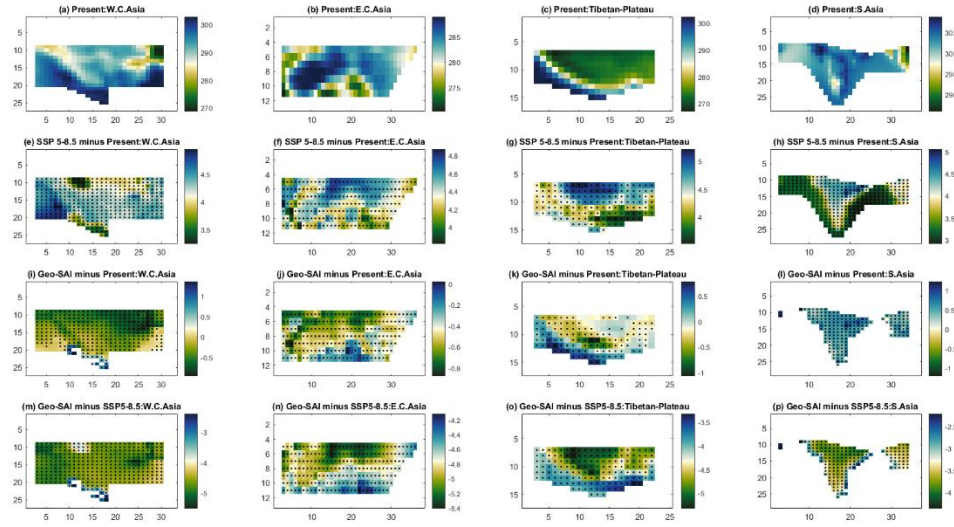

**Figure S9.** Ensemble mean maps of temperature over W.C. Asia (first column), E. C. Asia (second column), Tibetan Plateau (third column), and S. Asia (fourth column) in the present-day conditions (2015–2035), SSP minus baseline, SAI minus baseline and SAI minus SSP5-8.5 during 2071–2100. Dotted regions indicate the significant change in ensemble members.

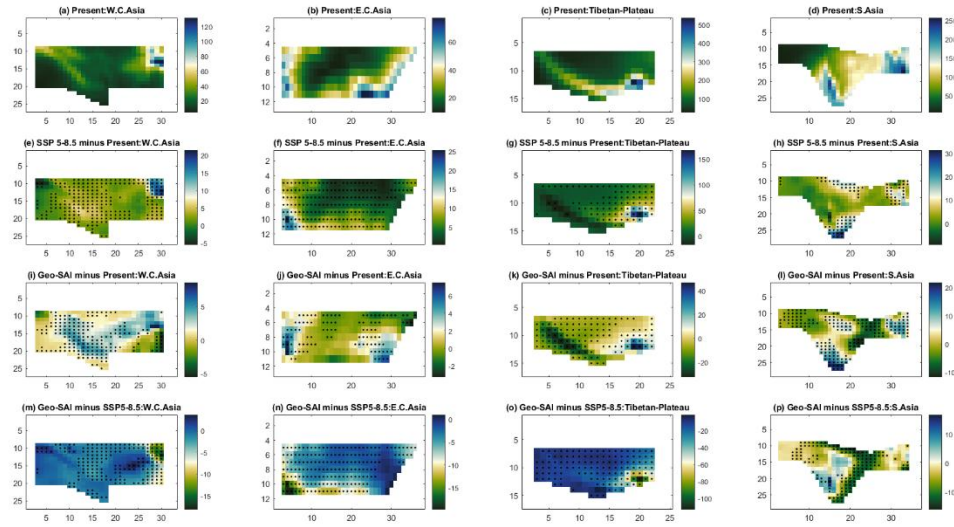

**Figure S10.** Same as Figure S9, but for precipitation.

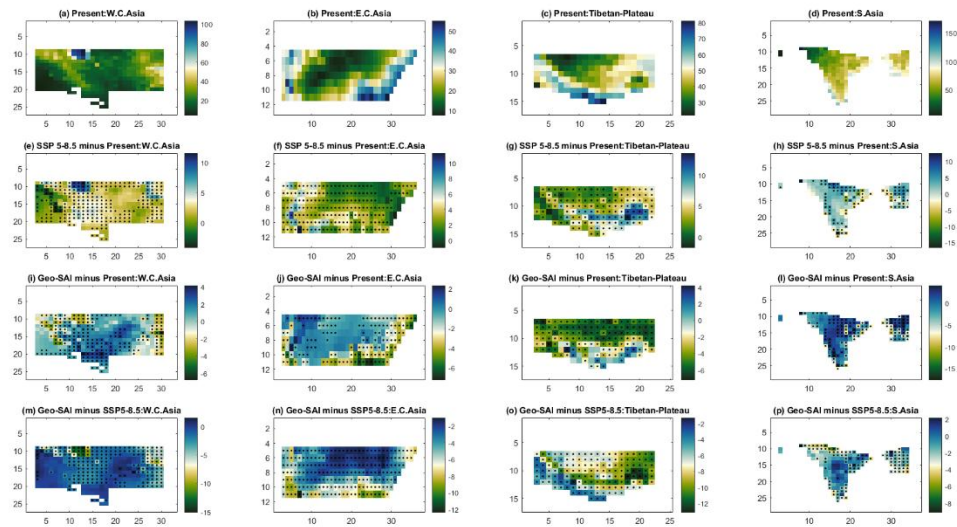

31

32 **Figure S11.** Same as Figure S9, but for RET.

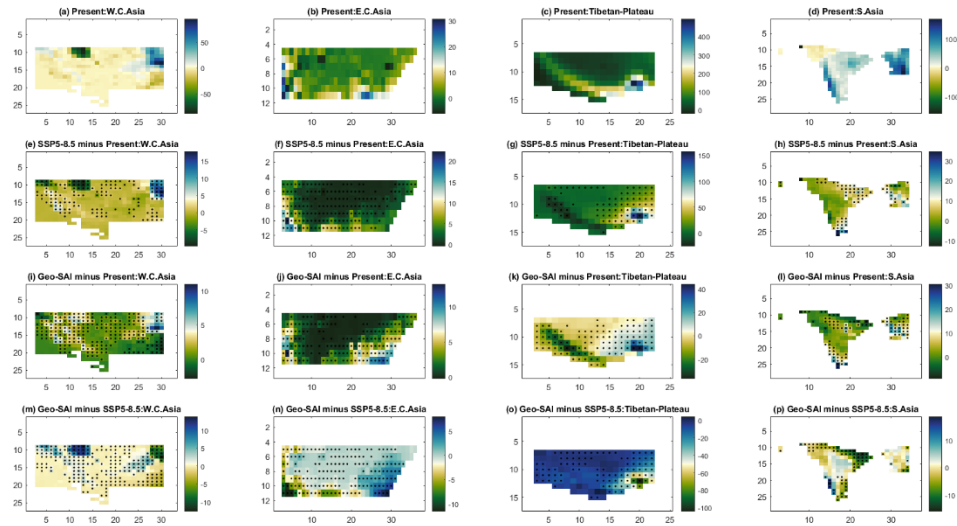

33

34 **Figure S12.** Same as Figure S9, but for Available water.

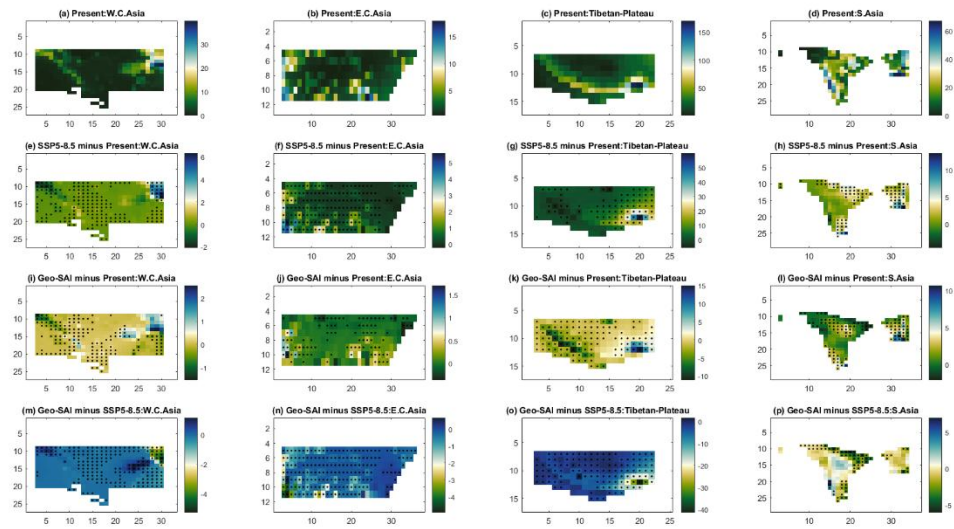

35

36 **Figure S13.** Same as Figure S9, but for runoff.

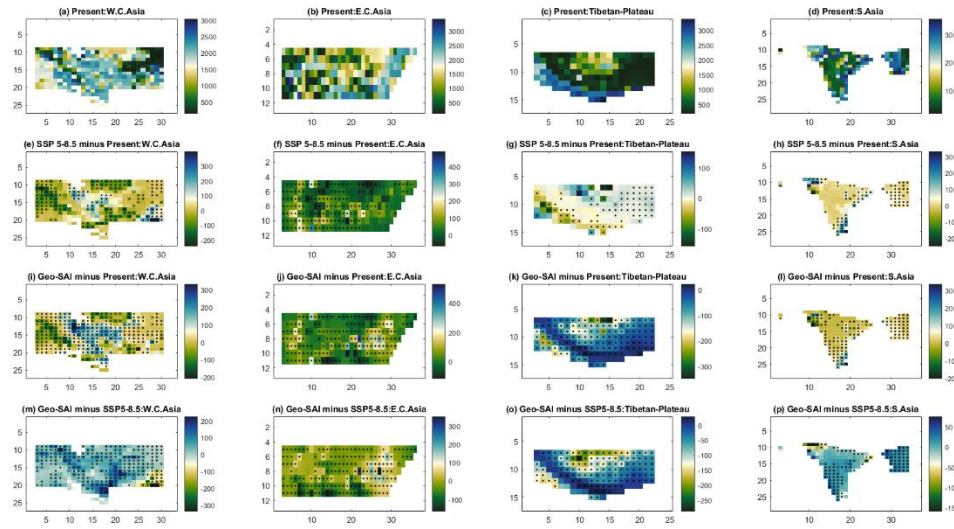

37

38 **Figure S14.** Same as Figure S9, but for soil moisture.



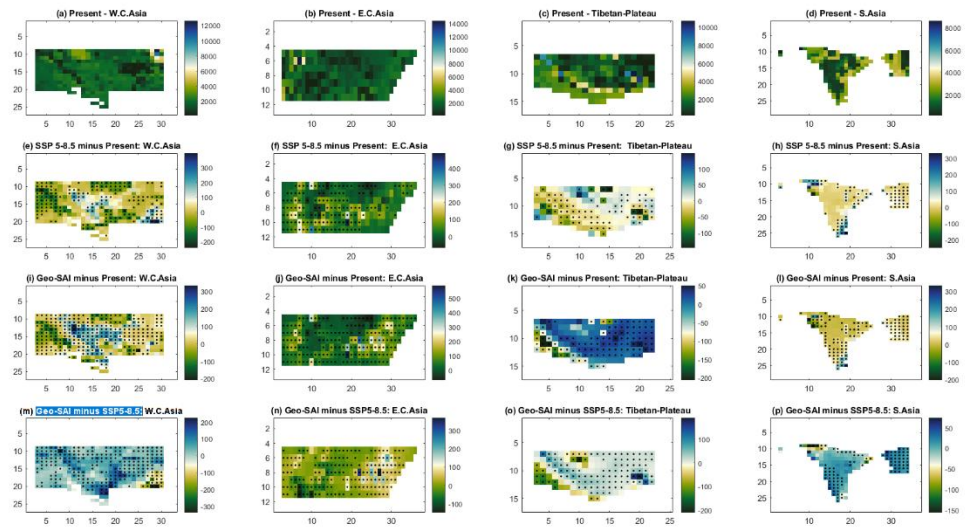

39

40 **Figure S15.** Same as Figure S9, but for TWS.

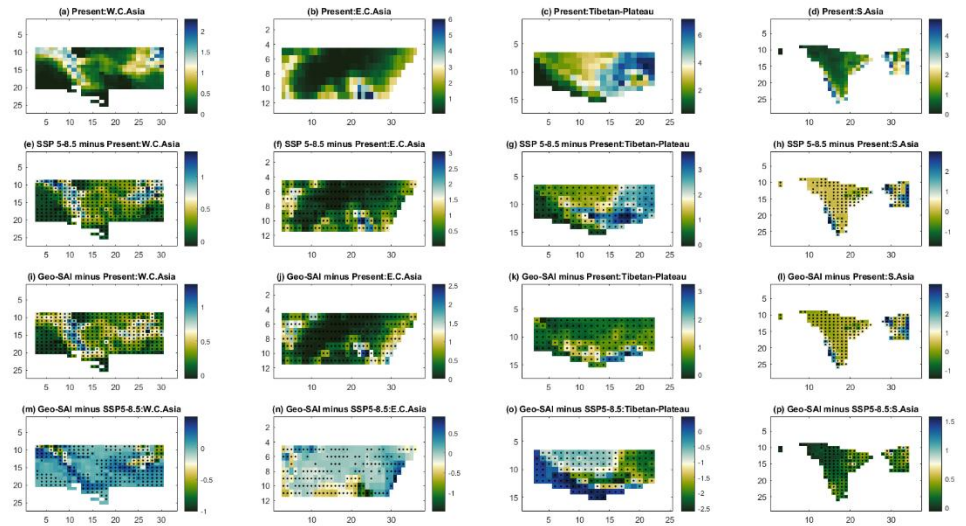

41

42 **Figure S16.** Same as Figure S9, but for LAI.

43
